# Supplementary material
Source: publisher figshare collection journal article supplement (https://frontiersin.figshare.com/ndownloader/files/22608800)
Supplement: Supplementary file [file 22608800]

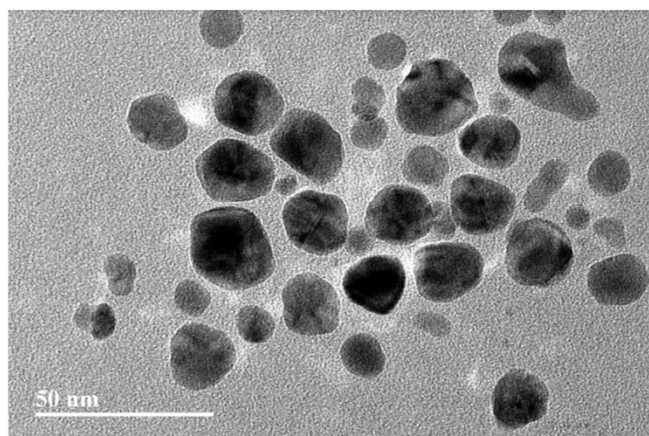

**Fig. S1** A TEM image of Pd-Fe.

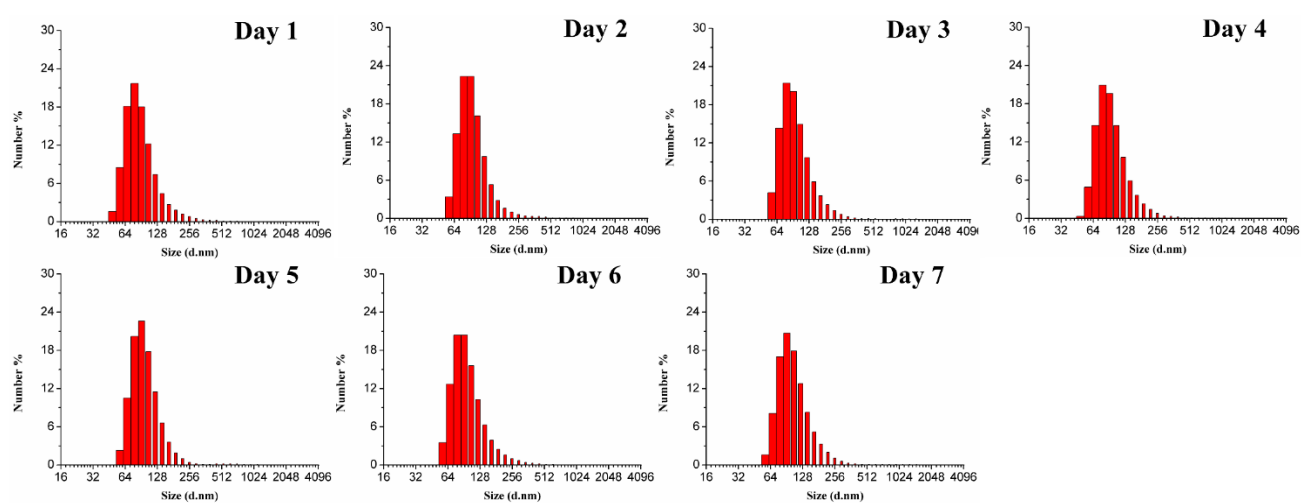

**Fig. S2** Stability of HSA-Pd-Fe-Ce6 NAs in DI water.

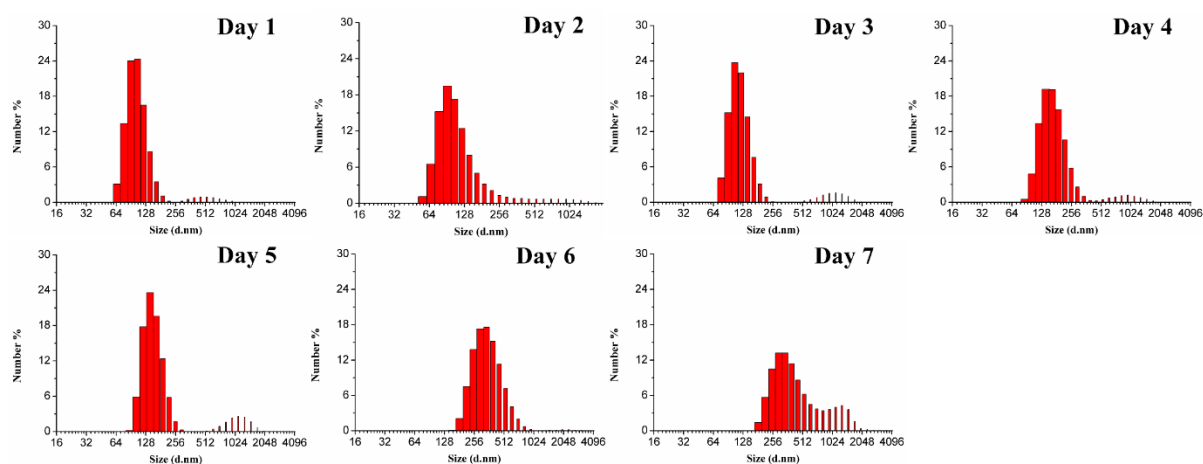

**Fig. S3** Stability of HSA-Ce6 NAs in DI water.

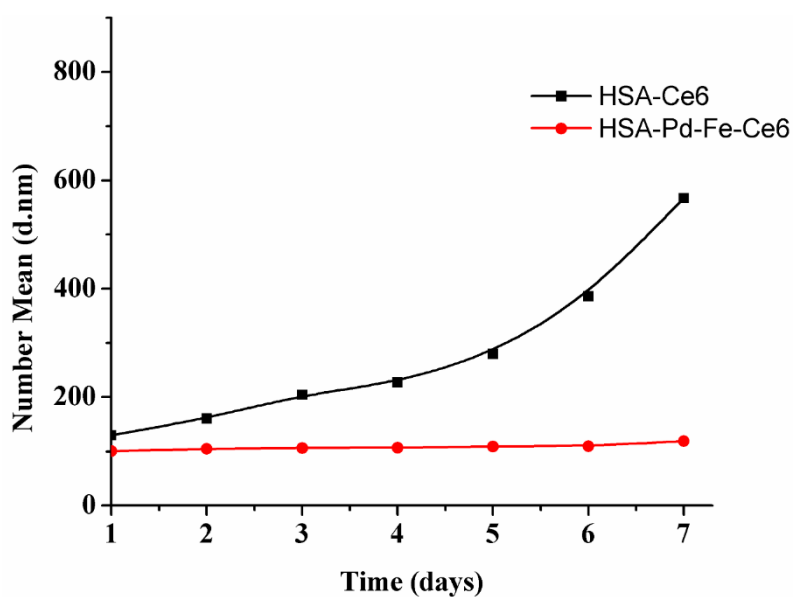

**Fig. S4** size change curve of **S2** and **S3**.

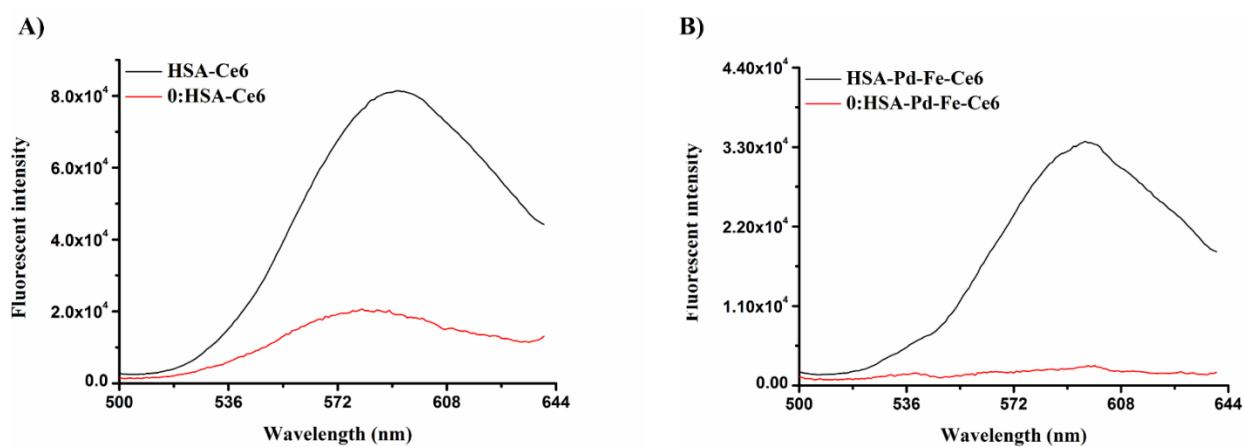

**Fig. S5** The fluorescence intensity of dihydroethidium (DHE) of **A)** HSA-Ce6 NPs and **B)** HSA-Pd-Fe-Ce6 NAs after mixed with H<sub>2</sub>O<sub>2</sub> (100  $\mu$ M), DNA (1 mg/ml) and DHE (4 mg/ml) in PBS (pH 5.5). 0: refers to the fluorescence intensity before mixed with DHE.

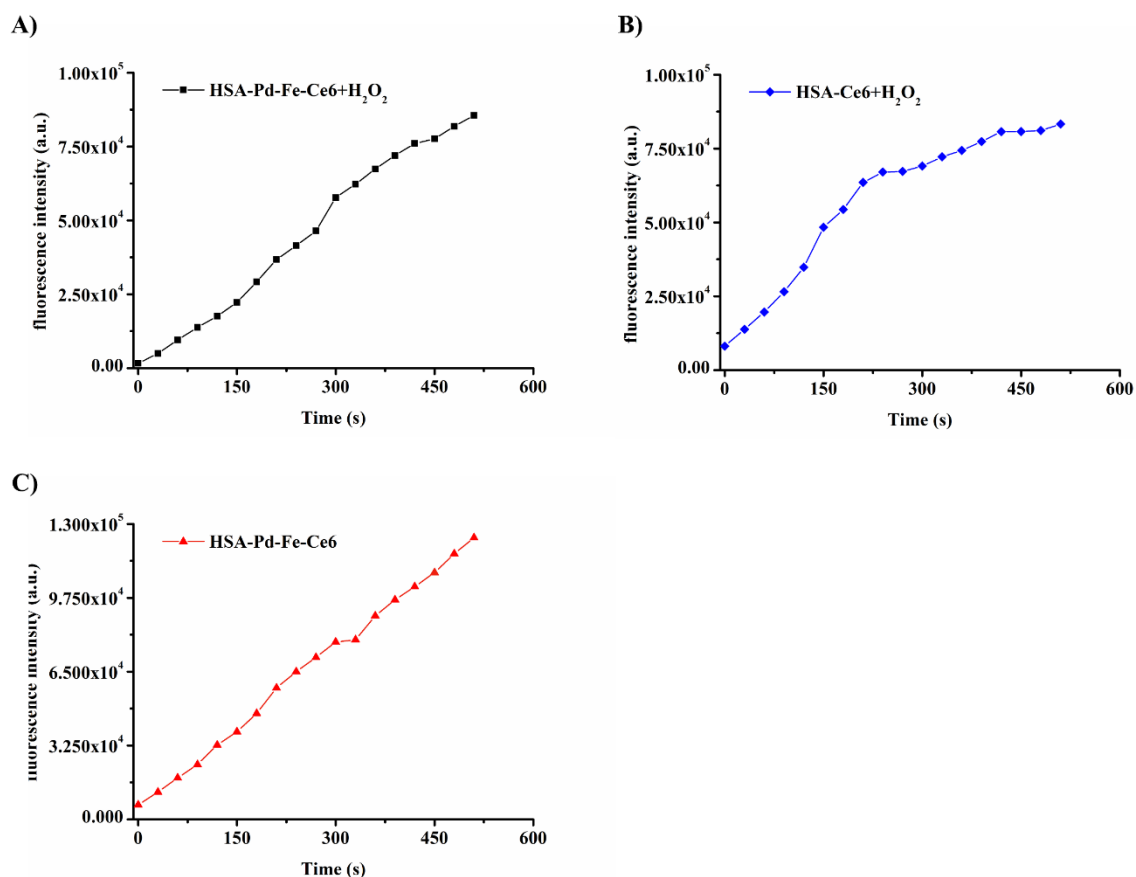

**Fig. S6** The fluorescence intensity of 2',7'-dichlorofluorescein diacetate (DCFH-DA) **A)** group HSA-Pd-Fe-Ce6 +H<sub>2</sub>O<sub>2</sub>, **B)** group HSA-Pd-Fe-Ce6 and **C)** group HSA-Ce6+H<sub>2</sub>O<sub>2</sub> NPs under 660 nm laser (0.5 w/cm<sup>2</sup>, 30 s) irradiation per 30 s.

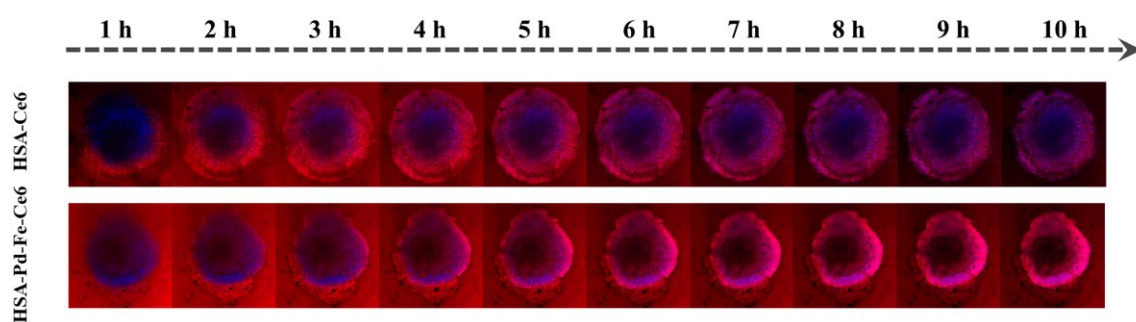

**Fig. S7** Images of the 3D spheroids of MCF-7 cells incubated with HSA-Pd-Fe-Ce6 or HSA-Ce6 per hour.

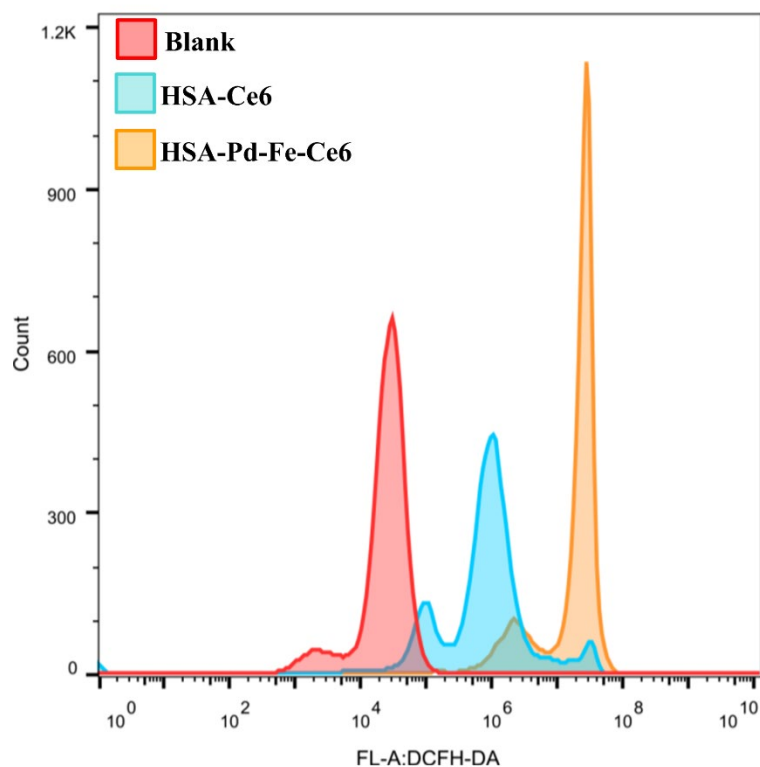

**Fig. S8** The generation of ROS determined by the DCFH-DA fluorescence of MCF-7 cells after coincubated with PBS or HSA-Ce6 nanoparticles (20  $\mu\text{g/ml}$ ) or HSA-Pd-Fe-Ce6 NAs (20  $\mu\text{g/ml}$ ) with  $\text{H}_2\text{O}_2$  (50  $\mu\text{M}$ ) for 2 h and further 20 minutes laser irradiation.( 660 nm,0.5  $\text{w/cm}^2$ ).

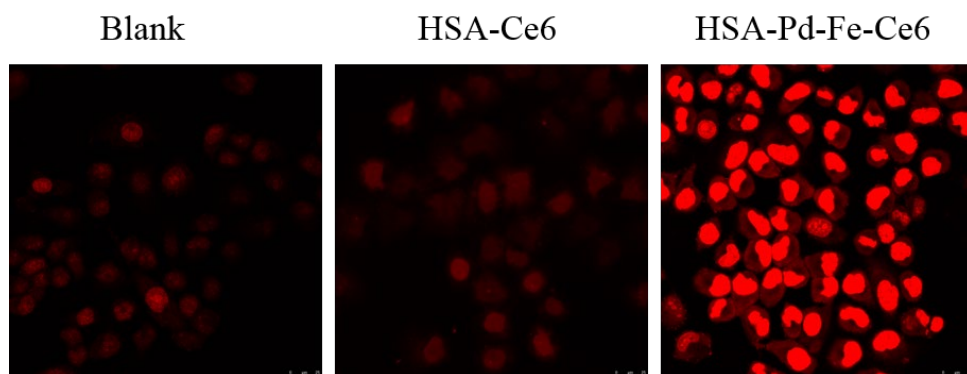

**Fig. S9** Use of a free radical indicator to evaluate the production of ROS ( $\cdot\text{OH}$ ,  $\cdot\text{O}_2^-$ ) after incubation of MCF-7 cells with dihydroethidium and  $\text{H}_2\text{O}_2$  (50  $\mu\text{M}$ ).

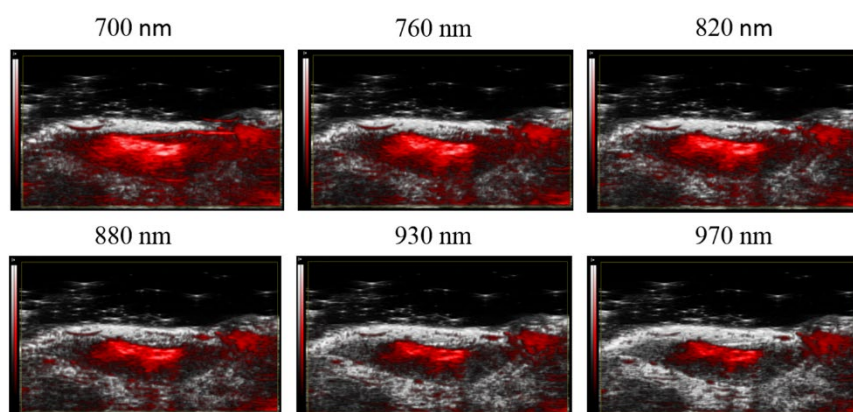

**Fig. S10** Photoacoustic signals of HSA-Pd-Fe-Ce6 nanoparticles at 700 nm, 760 nm, 820 nm, 880 nm, 930 nm and 970 nm.
